# Supplementary material for: Neurons Refine the Caenorhabditis elegans Body Plan by Directing Axial Patterning by Wnts
Source: PLoS Biol. 2013 Jan 8;11(1):e1001465. doi: 10.1371/journal.pbio.1001465 (PMC3539944; doi:10.1371/journal.pbio.1001465)
Supplement: Figure S6 — The reduced posterior body volume in vab-8 mutants is not sufficient to promote vulval fate signaling in epidermal progenitors. (A–D) Images showing posterior surface areas for posterior body volume calculations in wild-type, vab-8(lf), and dpy-17(lf); dpy-20(lf) mutants. Note that some vab-8 mutants with ectopic vulval fates at P8.p had posterior surface areas similar to those of some wild-type animals (compare [A] and [B]). (E) Table of posterior body volumes for wild-type, vab-8(lf), and dpy-17(lf); dpy-20(lf) mutants. Volumes were calculated by multiplying the mean thickness by the measured posterior surface area for each animal. p-Values were calculated using a two-tailed Student's t test. Note that the mean posterior body volumes of the total vab-8(lf) population, and of the vab-8 mutants specifically having ectopic vulval fates at P8.p, were not less than those of control dpy-17(lf); dpy-20(lf) mutants. (F and G) Body morphology of egfr/let-23(lf) mutant L1 larvae within minutes of being placed on 3% agar pads with either 50 mM (F) or 400 mM (G) sodium chloride. (H) Table of whole body volumes for egfr/let-23(lf) mutants as described in (E). The vab-8(lf) allele is gm138. Scale bar is 100 µm. (PDF) [file pbio.1001465.s006.pdf]

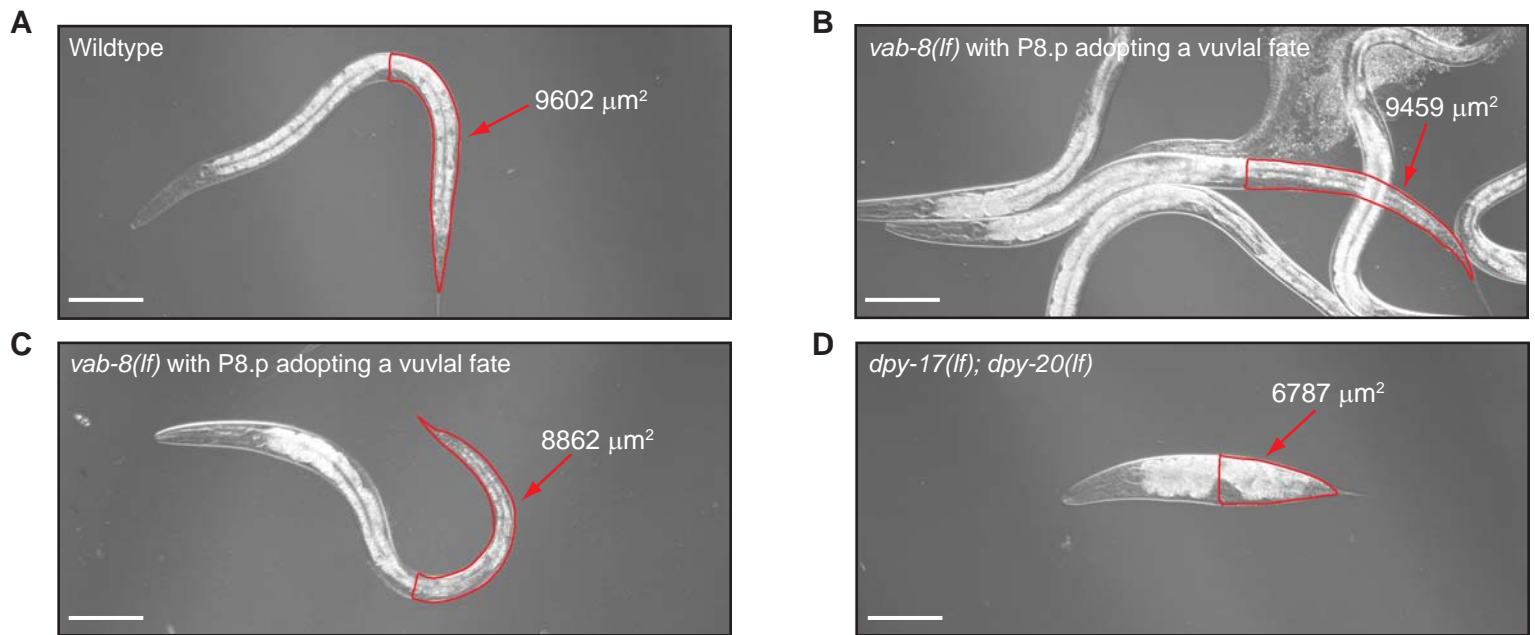

**E** L4 Posterior body volumes

| Genotype                      | Notes                      | Thickness ( $\mu\text{m}$ ) | Volume<br>( $\times 10^3$ cubic microns) | p-Value<br>(for volume)   |
|-------------------------------|----------------------------|-----------------------------|------------------------------------------|---------------------------|
| Wildtype                      |                            | $33.8 \pm 0.4$ (n=5)        | $369 \pm 31$ (n=18)                      |                           |
| <i>vab-8(lf)</i>              | Total population           | $30.7 \pm 1.5$ (n=6)        | $271 \pm 35$ (n=21)                      | <0.000001 vs Wildtype     |
| <i>vab-8(lf)</i>              | P8.p adopted a vulval fate | $31.0 \pm 1.0$ (n=2)        | $258 \pm 28$ (n=3)                       |                           |
| <i>dpy-17(lf); dpy-20(lf)</i> |                            | $34.5 \pm 2.3$ (n=6)        | $245 \pm 20$ (n=17)                      | 0.007 vs <i>vab-8(lf)</i> |

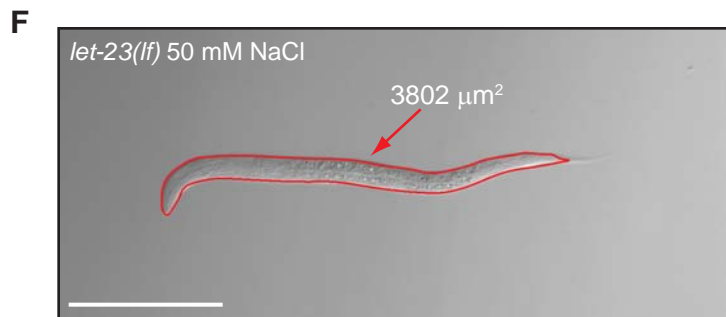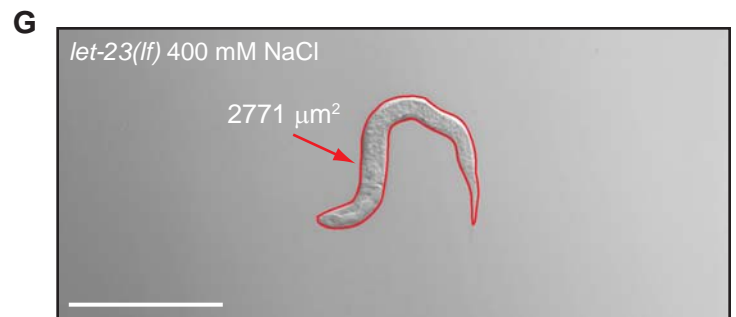

**H** L1 Whole body volumes

| Genotype          | [NaCl] | Thickness ( $\mu\text{m}$ ) | Volume<br>( $\times 10^3$ cubic microns) | p-Value<br>(for volume) |
|-------------------|--------|-----------------------------|------------------------------------------|-------------------------|
| <i>let-23(lf)</i> | 50 mM  | $19.0 \pm 0.8$ (n=10)       | $76 \pm 8$ (n=19)                        |                         |
| <i>let-23(lf)</i> | 400 mM | $15.7 \pm 1.8$ (n=10)       | $48 \pm 6$ (n=22)                        | <0.000001 vs 50 mM NaCl |
