# Supplementary material for: Neurons Refine the Caenorhabditis elegans Body Plan by Directing Axial Patterning by Wnts
Source: PubMed Central journal article supplement (PMC3539944; doi:10.1371/journal.pbio.1001465), 2013-01-08

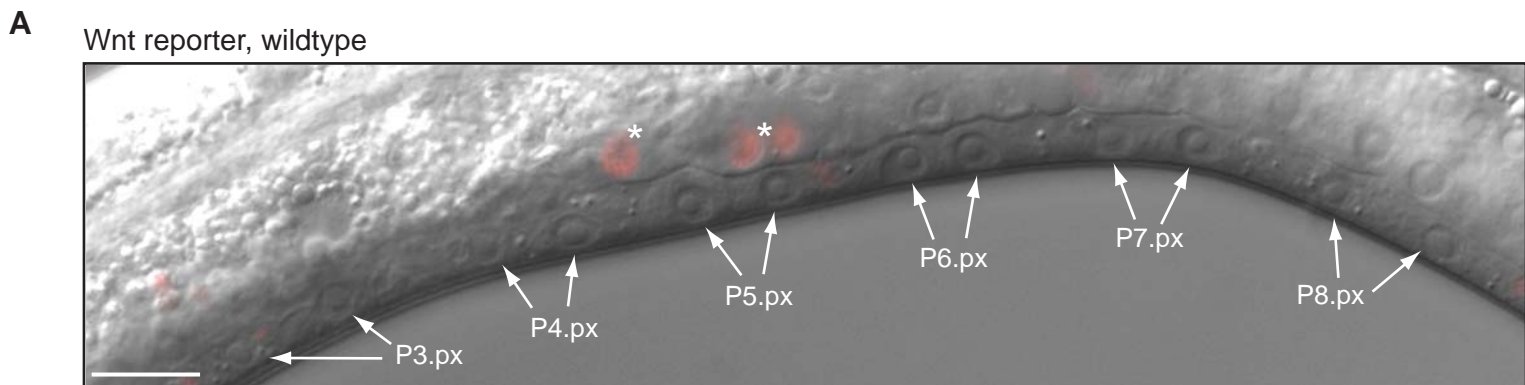

Wnt reporter, *pry-1(lf)*

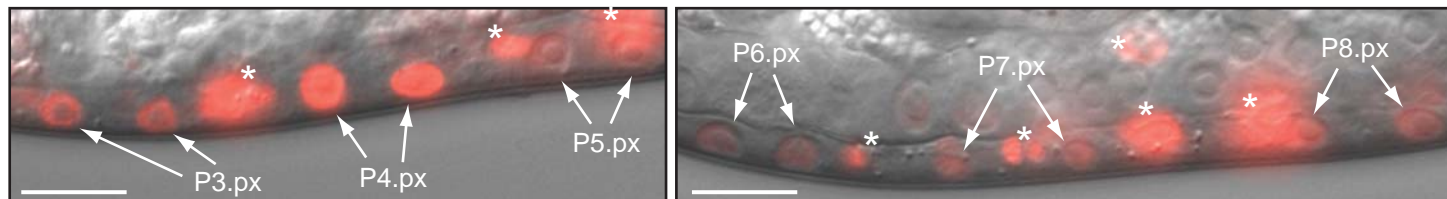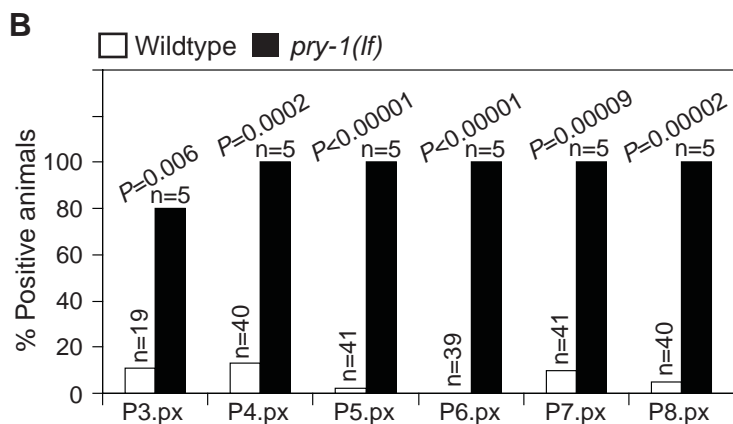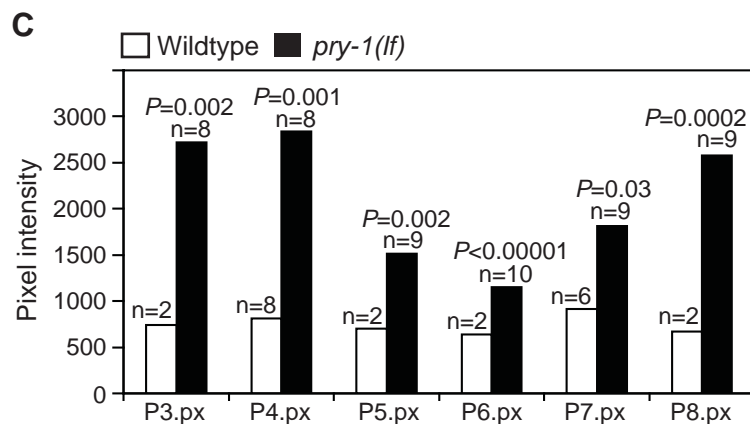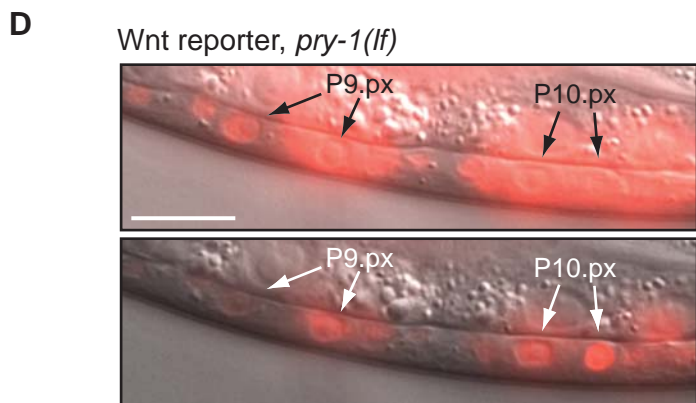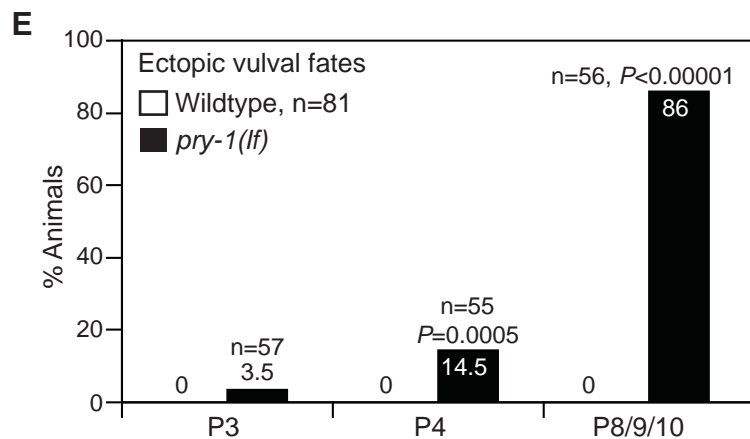

Supplement: pbio.1001465.s002.pdf [file pbio.1001465.s002.pdf]
